# Supplementary material for: Distribution of valence electrons of the flavin cofactor in NADH-cytochrome b5 reductase
Source: PubMed Central journal article supplement (PMC5320556; doi:10.1038/srep43162), 2017-02-22
Supplement: srep43162-s1.pdf [file srep43162-s1.pdf]

## **Supplementary Information**

### **Distribution of valence electrons of the flavin cofactor in NADH-cytochrome *b*<sub>5</sub> reductase**

Kiyofumi Takaba<sup>1,\*</sup>, Kazuki Takeda<sup>1,\*</sup>, Masayuki Kosugi<sup>1</sup>, Taro Tamada<sup>2</sup> and Kunio  
Miki<sup>1,\*\*</sup>

<sup>1</sup>Department of Chemistry, Graduate School of Science, Kyoto University, Sakyo-ku,  
Kyoto 606-8502, Japan.

<sup>2</sup>Quantum Beam Science Research Directorate, National Institutes for Quantum and  
Radiological Science and Technology, Tokai-mura, Ibaraki 319-1195, Japan.

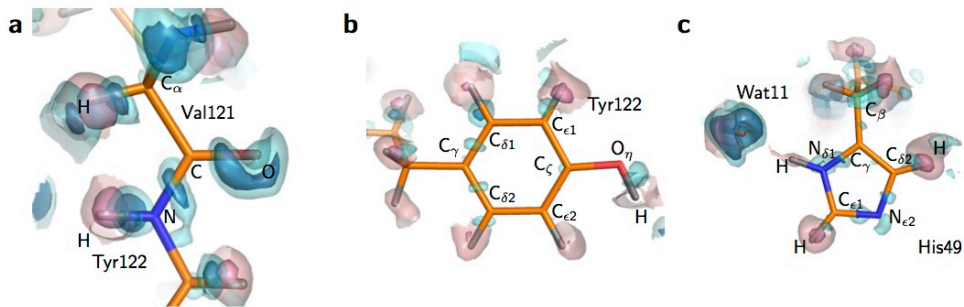

**Supplementary Figure 1 | Residual electron density after the ISAM refinement**

(a) The residual electron density around the peptide bond of Val121-Tyr122. The residual  $F_{\text{obs}} - F_{\text{calc}}$  map is shown as cyan and blue surfaces at contour levels of  $1.75\sigma$  and  $2.5\sigma$ . The hydrogen omit  $F_{\text{obs}} - F_{\text{calc}}$  map is overlaid as pink and magenta surfaces at contour levels of  $1.5\sigma$  and  $3.0\sigma$ . (b) The residual electron density around the side chain of Tyr122. (c) The residual electron density around the side chain of His49.

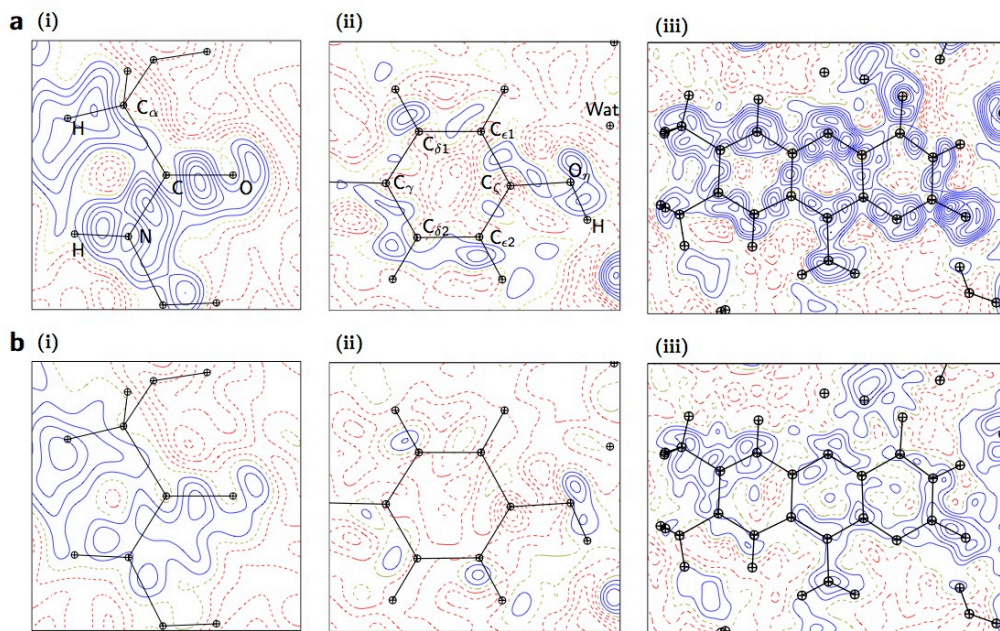

**Supplementary Figure 2 | Contour maps of the residual electron density for each refinement step**

(a) The residual electron densities after the ISAM refinement are shown at the interval of  $0.05 \text{ e}/\text{\AA}^3$ . (i) The peptide bond between Val121 and Tyr122. (ii) The side chain of Tyr122. (iii) The isoalloxazine ring of FAD. (b) The residual electron densities after the MAM refinement.

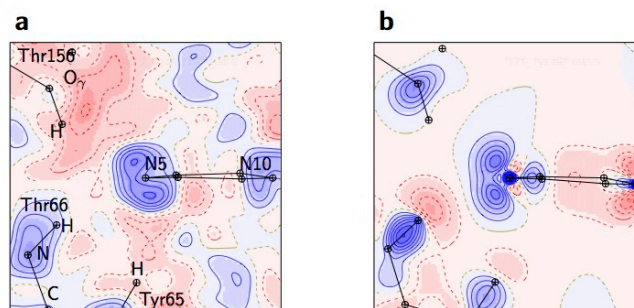

**Supplementary Figure 3 | Electron density maps around the N5 atom of FAD**

(a) The residual electron density after the ISAM refinement is shown at the interval of  $0.05 \text{ e}/\text{\AA}^3$ . The view is the same as in Fig. 2c. (b) The static deformation map.

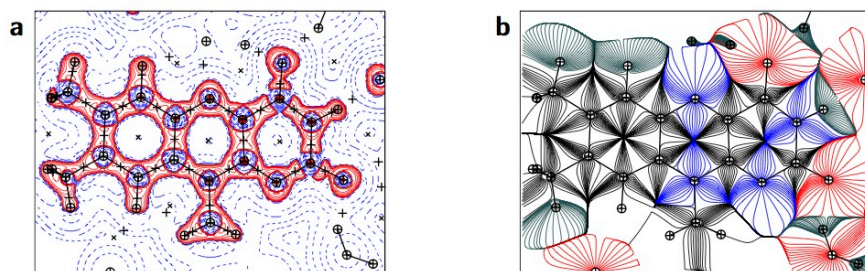

### Supplementary Figure 4 | Topological analysis

(a) The Laplacian  $\nabla^2\rho$  map around the isalloxazine ring. The view is the same as in Fig. 1c. The contour interval is  $0.05 \text{ e}/\text{\AA}^5$ . Red solid and blue dashed lines represent positive and negative levels, respectively. BCPs and RCPs are represented as “+” and “x”, respectively. (b) The gradient vector field.

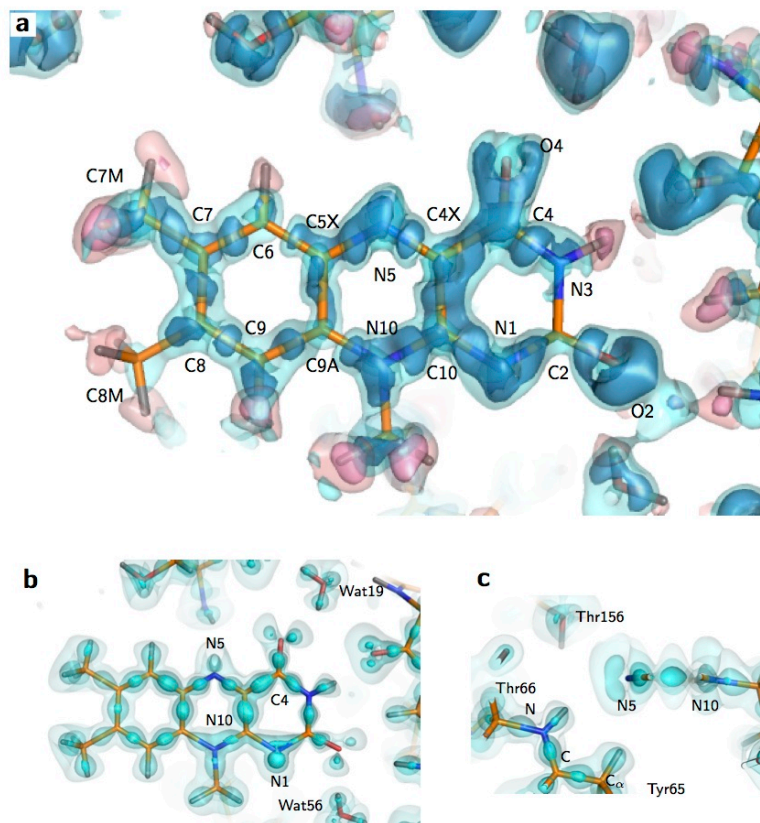

### Supplementary Figure 5 | Electron densities for Data II

(a) The residual electron density around the isoalloxazine ring of FAD. The  $F_{\text{obs}} - F_{\text{calc}}$  map after the ISAM refinement is shown at contour levels of  $1.5\sigma$  (cyan) and  $2.5\sigma$  (blue). The hydrogen omit  $F_{\text{obs}} - F_{\text{calc}}$  maps are also overlaid as pink and magenta surfaces at the contour levels of  $2.0\sigma$  and  $3.0\sigma$ . (b) The deformation map around the isoalloxazine ring of FAD. The cyan surfaces represent the electron density at contour levels of  $+0.01$ ,  $+0.2$  and  $+0.5 \text{ e}/\text{\AA}^3$ , respectively. (c) A close-up view of the deformation map for the N5 atom.

**Supplementary Table 1. Atomic charges**

| Atom  | Charge |
|-------|--------|
| O4    | -1.02  |
| C4    | +1.01  |
| N3    | -0.68  |
| HN3   | +0.53  |
| C2    | +1.64  |
| O2    | -0.69  |
| N1    | -1.20  |
| C10   | +0.82  |
| C4X   | +0.50  |
| N5    | -1.15  |
| C5X   | -0.07  |
| C6    | -0.11  |
| H6    | +0.31  |
| C7    | +0.05  |
| C7M   | -0.29  |
| HM71  | +0.22  |
| HM72  | +0.21  |
| HM73  | +0.22  |
| C8    | +0.05  |
| C8M   | -0.30  |
| HM81  | +0.22  |
| HM82  | +0.21  |
| HM83  | +0.22  |
| C9    | -0.04  |
| H9    | +0.24  |
| C9A   | -0.00  |
| N10   | -1.44  |
| C1'   | +0.10  |
| H1'1  | +0.23  |
| H1'2  | +0.24  |
| Total | +0.04  |

**Supplementary Table 2. Bond properties of FAD**

|         | length (Å)            | $\rho_{\text{BCP}}(\text{e}/\text{Å}^3)$ | $\nabla^2\rho_{\text{BCP}}(\text{e}/\text{Å}^5)$ | $n_{\text{topo}}$ |
|---------|-----------------------|------------------------------------------|--------------------------------------------------|-------------------|
| C4–C4X  | 1.460(8) <sup>a</sup> | 2.14                                     | -18.9                                            | 1.22              |
| C10–C4X | 1.420(8)              | 2.22                                     | -21.2                                            | 1.35              |
| C5X–C6  | 1.386(8)              | 2.30                                     | -22.2                                            | 1.52              |
| C5X–C9A | 1.424(8)              | 2.20                                     | -19.4                                            | 1.48              |
| C6–C7   | 1.371(8)              | 2.18                                     | -21.0                                            | 1.40              |
| C7–C7M  | 1.510(9)              | 1.76                                     | -13.4                                            | 1.12              |
| C7–C8   | 1.419(9)              | 2.02                                     | -16.9                                            | 1.36              |
| C8–C8M  | 1.491(9)              | 1.81                                     | -14.3                                            | 1.14              |
| C8–C9   | 1.396(9)              | 2.11                                     | -19.1                                            | 1.37              |
| C9–C9A  | 1.374(8)              | 2.26                                     | -22.5                                            | 1.42              |
| C4–N3   | 1.364(7)              | 2.49                                     | -25.8                                            | 1.20              |
| N3–C2   | 1.406(8)              | 2.26                                     | -22.5                                            | 1.02              |
| C2–N1   | 1.345(8)              | 2.36                                     | -23.6                                            | 1.09              |
| N1–C10  | 1.332(7)              | 2.30                                     | -19.2                                            | 1.22              |
| C10–N10 | 1.387(7)              | 2.35                                     | -21.7                                            | 1.21              |
| C4X–N5  | 1.340(7)              | 2.37                                     | -22.1                                            | 1.26              |
| N5–C5X  | 1.370(7)              | 2.30                                     | -19.5                                            | 1.20              |
| C9A–N10 | 1.411(7)              | 2.25                                     | -18.0                                            | 1.16              |
| N10–C1' | 1.443(8)              | 1.99                                     | -13.3                                            | 1.01              |
| O4–C4   | 1.235(7)              | 3.19                                     | -42.0                                            | 1.70              |
| C2–O2   | 1.267(7)              | 3.05                                     | -35.2                                            | 1.56              |

<sup>a</sup>Values in parentheses are estimated standard deviations derived from the full-matrix least squares refinement.



**Supplementary Table 3. Properties of hydrogen bonding around FAD**

| Donor                  | Acceptor | $d_{\text{H-A}}$ (Å) | $\rho_{\text{BCP}}$ (e/Å <sup>3</sup> ) | $\nabla^2\rho_{\text{BCP}}$ (e/Å <sup>5</sup> ) | $H_{\text{BCP}}$ (kJ/mol·a <sub>0</sub> <sup>3</sup> ) <sup>b</sup> | $D_e$ (kJ/mol) |
|------------------------|----------|----------------------|-----------------------------------------|-------------------------------------------------|---------------------------------------------------------------------|----------------|
| C <sub>α</sub> -Tyr65  | N5-FAD   | 2.36(7) <sup>a</sup> | 0.077                                   | 1.26                                            | 7.06                                                                | 10.09          |
| N-Thr66                | N5-FAD   | 2.24(8)              | 0.066                                   | 1.51                                            | 10.33                                                               | 10.28          |
| N3-FAD                 | O-Val80  | 1.78(9)              | 0.210                                   | 3.57                                            | 9.29                                                                | 39.29          |
| C <sub>α</sub> -Ile81  | O2-FAD   | 2.33(8)              | 0.064                                   | 1.25                                            | 8.19                                                                | 8.89           |
| N-Lys82                | O2-FAD   | 2.14(9)              | 0.065                                   | 1.86                                            | 13.60                                                               | 11.77          |
| O <sub>γ</sub> -Thr156 | O4-FAD   | 1.89(10)             | 0.151                                   | 2.92                                            | 13.13                                                               | 26.58          |
| Wat6                   | O4-FAD   | 1.86(10)             | 0.176                                   | 2.86                                            | 8.81                                                                | 30.20          |
| Wat72                  | O2-FAD   | 1.79(10)             | 0.214                                   | 3.59                                            | 8.67                                                                | 40.32          |

<sup>a</sup>Values in parentheses are estimated standard deviations derived from the full-matrix least squares refinement.

<sup>b</sup>a<sub>0</sub> is the Bohr radius.

**Supplementary Table 4 | Crystallographic and refinement statistics for Data II**

| Data II                                                  |                                                                                    |
|----------------------------------------------------------|------------------------------------------------------------------------------------|
| <b>Data collection</b>                                   |                                                                                    |
| Space group                                              | $P2_12_12_1$                                                                       |
| Cell dimensions                                          |                                                                                    |
| <i>a</i> , <i>b</i> , <i>c</i> (Å)                       | 48.664, 72.177, 85.209                                                             |
| Resolution (Å)                                           | 29.3-2.0 (low resolution),<br>10.0-0.80 (0.81-0.80) <sup>a</sup> (high resolution) |
| $R_{\text{merge}}^b$ (%)                                 | 6.7 (185.7) <sup>a</sup>                                                           |
| $I/\sigma I$                                             | 31.6 (1.3) <sup>a</sup>                                                            |
| Completeness (%)                                         | 99.9 (99.9) <sup>a</sup>                                                           |
| Redundancy                                               | 7.5 (6.8) <sup>a</sup>                                                             |
| $CC_{1/2}$ (%)                                           | (41.4) <sup>a</sup>                                                                |
| <b>Refinement</b>                                        |                                                                                    |
| Resolution (Å)                                           | 29.3-0.80                                                                          |
| No. reflections                                          | 314475                                                                             |
| $R_{\text{work}}^c / R_{\text{free}}^d$ (%) (ISAM/SHELX) | 13.8/15.8                                                                          |
| $R_{\text{work}}^c / R_{\text{free}}^d$ (%) (MAM/MOPRO)  | 12.2/14.4                                                                          |
| No. non-H atoms                                          |                                                                                    |
| Protein                                                  | 2427                                                                               |
| Ligand/ion                                               | 90                                                                                 |
| Water                                                    | 620                                                                                |
| No. H atoms                                              |                                                                                    |
| Protein                                                  | 2200                                                                               |
| Ligand/ion                                               | 19                                                                                 |
| Water                                                    | 31                                                                                 |
| No. multipole parameters                                 | 23103                                                                              |

<sup>a</sup>Highest resolution shell is shown in parentheses.

$$^b R_{\text{merge}} = \frac{\sum_{\text{hkl}} \sum_i |I_{\text{hkl},i} - \langle I_{\text{hkl}} \rangle|}{\sum_{\text{hkl}} \sum_i I_{\text{hkl},i}}$$

$$^c R_{\text{work}} = \frac{\sum_{\text{hkl}} ||F_{\text{obs}}| - |F_{\text{calc}}||}{\sum_{\text{hkl}} |F_{\text{obs}}|}$$

<sup>d</sup> $R_{\text{free}}$  was calculated by using 5% of the reflections that were not included in the refinement as a test set.
